# SARS-CoV-2 Viral Clearance and Evolution Varies by Extent of Immunodeficiency

Yijia Li<sup>\*1 2 3</sup>, Manish C. Choudhary<sup>\*1</sup>, James Regan<sup>\*1</sup>, Julie Boucau<sup>4</sup>, Anusha Nathan<sup>4 5</sup>, Tessa Speidel<sup>6</sup>, May Yee Liew<sup>2 7</sup>, Gregory E. Edelstein<sup>1</sup>, Yumeko Kawano<sup>1</sup>, Rockib Uddin<sup>2 7</sup>, Rinki Deo<sup>1</sup>, Caitlin Marino<sup>4</sup>, Matthew A. Getz<sup>4</sup>, Zahra Reynold<sup>2</sup>, Mamadou Barry<sup>2</sup>, Rebecca F. Gilbert<sup>2</sup>, Dessie Tien<sup>2</sup>, Shruti Sagar<sup>2</sup>, Tammy D. Vyas<sup>2</sup>, James P. Flynn<sup>1</sup>, Sarah P. Hammond<sup>2</sup>, Lewis A. Novack<sup>1</sup>, Bina Choi<sup>1</sup>, Manuela Cernadas<sup>1</sup>, Zachary S. Wallace<sup>2</sup>, Jeffrey A. Sparks<sup>1</sup>, Jatin M. Vyas<sup>2 4</sup>, Michael S. Seaman<sup>6</sup>, Gaurav D. Gaiha<sup>2 4</sup>, Mark J. Siedner<sup>#2</sup>, Amy K. Barczak<sup>#2 4</sup>, Jacob E. Lemieux<sup>#2 7</sup>, Jonathan Z. Li<sup>#1</sup>

## Affiliations:

1. Department of Medicine, Brigham and Women's Hospital, Harvard Medical School, Boston, MA, USA
2. Department of Medicine, Massachusetts General Hospital, Harvard Medical School, Boston, MA, USA
3. University of Pittsburgh Medical Center, Pittsburgh, PA, USA
4. Ragon Institute of MGH, MIT and Harvard, Cambridge, MA, USA
5. Program in Health Sciences and Technology, Harvard Medical School and Massachusetts Institute of Technology, Boston, MA 02115, USA
6. Center for Virology and Vaccine Research, Beth Israel Deaconess Medical Center, Harvard Medical School, Boston, MA, USA
7. Broad Institute of MIT and Harvard, Cambridge, MA, USA

<sup>\*</sup>, <sup>#</sup> Equal contribution

## Funding:

This work was supported by the National Institutes of Health (U19 AI110818), the Massachusetts Consortium for Pathogen Readiness SARS-CoV-2 Variants Program and the Massachusetts General

27 Hospital Department of Medicine. Drs. JA Sparks and ZS Wallace are supported by the National Institute  
 28 of Arthritis and Musculoskeletal and Skin Diseases (R01 AR080659). Dr. JA Sparks is also supported by  
 29 the Llura Gund Award funded by the Gordon and Llura Gund Foundation. Dr. GD Gaiha is supported by  
 30 the NIH (DP2AI154421, R01AI176533 and DP1DA058476), the Bill and Melinda Gates Foundation,  
 31 Burroughs Wellcome Career Award for Medical Scientists and Howard Goodman Fellowship. Dr. JZ Li  
 32 was also supported by a grant from Merck. Dr. Y Li was supported by Rustbelt CFAR (Case Western  
 33 Reserve University/University Hospitals Cleveland Medical Center and University of Pittsburgh, P30  
 34 AI036219). The BSL3 laboratory where viral culture work was performed is supported by the Harvard  
 35 CFAR (P30 AI060354). The funders had no role in the study design; in the collection, analysis, and  
 36 interpretation of data; in the writing of the manuscript; or in the decision to submit the manuscript for  
 37 publication.

## Abstract

Despite vaccination and antiviral therapies, immunocompromised individuals are at risk for prolonged SARS-CoV-2 infection, but the immune defects that predispose to persistent COVID-19 remain incompletely understood. In this study, we performed detailed viro-immunologic analyses of a prospective cohort of participants with COVID-19. The median time to nasal viral RNA and culture clearance in the severe hematologic malignancy/transplant group (S-HT) were 72 and 21 days, respectively, which were significantly longer than clearance rates in the severe autoimmune/B-cell deficient (S-A), non-severe, and non-immunocompromised groups ( $P < 0.001$ ). Participants who were severely immunocompromised had greater SARS-CoV-2 evolution and higher risk of developing antiviral treatment resistance. Both S-HT and S-A participants had diminished SARS-CoV-2-specific humoral, while only the S-HT group had reduced T cell-mediated responses. This highlights the varied risk of persistent COVID-19 across immunosuppressive conditions and suggests that suppression of both B and T cell responses results in the highest contributing risk of persistent infection.

## Introduction

Coronavirus Disease 2019 (COVID-19) vaccinations have drastically transformed the landscape of the COVID-19 pandemic by offering significant protection against infection acquisition, and severe diseases<sup>1,2</sup>, and ultimately have averted tens of millions of deaths<sup>3</sup>. Unfortunately, not all individuals respond to vaccination equally well, and immunocompromised individuals can have poor vaccine responses<sup>4,5</sup> and worse COVID-19-related outcomes<sup>6,7</sup>. Each new variant of Severe Acute Respiratory Syndrome Coronavirus-2 (SARS-CoV-2) brings risks of resistance to current treatments, particularly targeted antibody therapies<sup>8,9</sup>, resistance to vaccine-induced and naturally acquired immunity<sup>9,10</sup>, and increased transmissibility<sup>10</sup>. Immunocompromised individuals have been observed to harbor detectable SARS-CoV-2 virus for longer than non-immunocompromised individuals<sup>11-13</sup>. Such individuals represent a potential origin of novel SARS-CoV-2 variants as persistent infection has been associated with accelerated viral evolution<sup>11,13</sup>. However, the immunocompromised state is composed of a range of conditions and immune defects. These defects that predispose to persistent COVID-19 remain under-characterized. While there have been a number of case reports of persistent COVID-19 in immunosuppressed individuals<sup>11-16</sup> showing excessively prolonged viral shedding, persistent disease, and intra-host virological genetic diversity, there remains a need for larger scale studies with a comprehensive virologic and immunologic characterization to better elucidate the immunologic risk factors for and mechanisms of persistent infection. To this end, we hereby present a detailed longitudinal virological and immunological analysis of a cohort of immunocompromised and non-immunocompromised participants with SARS-CoV-2 infection with the goal of characterizing the virologic spectrum of persistent infection and exploring the immunologic determinants that predispose to its occurrence.

## Results

### Participant Characteristics

Fifty-six immunocompromised participants and 184 non-immunocompromised participants enrolled in the POSITIVES longitudinal cohort study were included in this analysis<sup>17-19</sup>. Demographic information and key viral characteristics are shown in Table 1. Immunocompromised participants were significantly older than non-immunocompromised controls (median 55 vs 46 years,  $P=0.001$ ), and more likely to receive monoclonal antibody (mAb) and/or antiviral treatment against SARS-CoV-2. The two groups had comparable sex, race, and ethnicity profiles and a similar median time from symptom onset/first positive COVID-19 test to enrollment (5 vs 4 days). We further subdivided immunocompromised participants into the severe hematologic-oncology/transplant (S-HT,  $n=12$ ), severe autoimmune/B-cell deficient (S-A,  $n=13$ ) and non-severe (NS,  $n=31$ ) groups (refer to Supplementary Tables 1 and 2 for detailed categorization). Three participants died due to severe COVID-19 or COVID-19 related complications, all of whom were in the immunocompromised sub-group (S-HT and S-A).

### Delayed Viral Clearance in Hematologic Oncology and Transplant Participants

We first aimed to characterize viral dynamics in the upper respiratory tract in participants with different categories of immunocompromising conditions. Immunocompromised and non-immunocompromised participants had similar peak vRNA levels (5.1, 5.1, 4.9, and 5.7  $\log_{10}$  SARS-CoV-2 copies/ml in S-HT, S-A, NS and non-immunocompromised groups,  $P=0.5$ ). However, the rates of nasal vRNA decay were significantly different between the immunocompromising categories, with the S-HT group demonstrating significantly slower viral clearance compared to other groups (Fig. 1a and 1b). Median time to nasal vRNA clearance in the S-HT group was 72 days (95% confidence interval [CI] 5, not available [NA]) compared to 7 (6, NA) days for the S-A, 11 (8, 16) days for the NS and 11 (10, 12) days for the non-immunocompromised group (Fig. 1b, log-rank  $P=0.005$ ). Similarly, the S-HT group experienced

significant delay in the clearance of culturable virus (Fig. 1c and 1d). Median time to viral culture clearance in the S-HT group was 21 days (95%CI 5, NA) compared to 6.5 (5, NA) days for the S-A group, 6 days (5, 7) for the NS group and 7 days (6, 7) for the non-immunocompromised group (Fig. 1d, log-rank  $P=0.0007$ , Fig. 1d). After 30 days from symptom onset or first positive test, 50%, 15%, and 6.5% of participants from S-HT, S-A and NS groups had detectable vRNA, compared to 0% in non-immunocompromised group ( $P<0.0001$ , Extended Data Fig. 1a). In addition, 33% of S-HT and 8.3% of S-A participants still had culturable virus, compared to 0% in the NS and non-immunocompromised groups after 30 days ( $P<0.0001$ , Extended Data Fig. 1b). Compared to the non-immunocompromised group, the S-HT group was significantly associated with delayed vRNA clearance (adjusted hazard ratio [aHR] for viral clearance, 0.35, 95% CI 0.13-0.91,  $P=0.03$ ) and culturable virus clearance (aHR 0.34 for viral clearance, 95% CI 0.15-0.76,  $P=0.009$ ), after adjusting for demographics, number of vaccinations and antiviral use (Table 2).

### **Increased Viral Evolution and Genetic Diversity in Immunocompromised Participants**

We used gene-specific next-generation sequencing approach to quantify the number of unique intra-host single-nucleotide variants (iSNVs) in the S gene present at  $>3\%$  frequency within each sample. This analysis was limited to participants with a viral genome available both at baseline and at least one follow-up timepoint. Severely immunocompromised (S-HT and S-A) participants harbored a greater number of iSNVs over time compared to NS and non-immunocompromised group participants, although these comparisons did not reach statistical significance (Fig. 2a). To evaluate viral diversity, we calculated the average pairwise distance both at the nucleotide and at the amino-acid level. Nucleotide average pairwise distance was significantly higher in the severe immunocompromised (S-HT and S-A) group compared to either non-severe ( $4.0E-4$  vs  $8.2E-5$ ,  $P<0.001$  Dunn's test with Benjamini-Hochberg adjustment) or non-immunocompromised groups ( $4.0E-4$  vs  $2.3E-5$ ,  $P<0.001$ , Fig. 2b). Similar results were

obtained when the average pairwise distances were calculated for amino acids (Extended Data Fig. 2a). Among participants with longitudinal sequences, 39% of the participants in immunocompromised group versus 12% in the non-immunocompromised group had evidence of viral nucleotide changes (Fisher's exact  $P < 0.001$ , Fig. 2c). These nucleotide changes were distributed across the entire length of the S gene (Fig. 2d).

### **Increased Risk of Treatment-Emergent Resistance to Anti-SARS-CoV-2 Monoclonal Antibody Therapy**

Deep sequencing analysis of Spike gene was carried out to evaluate the dynamics of mutation emergence in the presence of mAb treatment as earlier reports have shown evidence of mAb resistance emergence both in immunocompromised and non-immunocompromised participants<sup>13,20-29</sup>. In total, 34 participants across different study groups received mAb therapy, 10 in S-HT, 9 in S-A, 5 in NS, and 10 in non-immunocompromised groups (Details in Supplemental Table 3). Of these, we were able to evaluate the risk of resistance emergence in a subset of participants for whom sequences were available at both baseline and at least one follow-up time point. Five out of nine (56%) severely immunocompromised participants (S-HT and S-A) developed mAb-specific resistance mutations (Extended data Fig. 2b). This was a significantly higher rate than that found in the non-severe or non-immunocompromised groups (0/11 [0%] combined, Fisher's exact  $P = 0.008$ ) (Fig 2e).

### **Suboptimal Humoral Response in Severely Immunocompromised Participants**

We next characterized the antibody response in immunocompromised and non-immunocompromised participants. In participants whose serum sample was available ( $n=94$ ), including those who had previously received monoclonal antibodies, we found no significant difference in nAb titers between the different immunocompromised and non-immunocompromised groups at early and later sampling time points, although this analysis may

have been limited due to individuals who received anti-SARS-CoV-2 monoclonal antibody infusion before sample collection (either therapeutic or pre-exposure prophylaxis) (Fig. 3a and 3b). The non-immunocompromised group had a significant increase in anti-ancestral and anti-variant spike nAb levels during follow-up, whereas we did not observe a significant increase in antibody levels in the immunocompromised group (Fig. 3a and 3b). However, after excluding individuals with exposure to mAb therapies, the severe immunocompromised group showed no significant changes in either anti-ancestral or anti-variant Spike nAb levels, while the non-severe immunocompromised group demonstrated a moderate increase and the non-immunocompromised group demonstrated the greatest increase in nAb levels, plateauing at day 25-30 (Fig. 3c and d).

In a generalized estimating equation (GEE) model adjusted for factors associated with nAb levels, severely immunocompromised participants were only able to mount 0.18-fold (approximately 5-fold lower) of the anti-ancestral Spike antibody (95% CI 0.05-0.60) and 0.08-fold (approximately 12-fold lower) of the anti-variant Spike antibody (95% CI 0.03-0.22) compared to non-immunocompromised participants (Extended Fig. 3a, b). Non-severe immunocompromised status was not associated with significant differences in nAb changes from acute to post-infection, compared to non-immunocompromised group. In the whole cohort, each dose of vaccinations prior to SARS-CoV-2 infection was associated with 1.70-fold (95% CI 1.25 to 2.30) and 1.35-fold (95% CI 1.01 to 1.79) increase in anti-ancestral and anti-variant Spike antibody levels, respectively (Extended Fig. 3ab).

We also evaluated binding antibody against nucleocapsid protein because this assay is not affected by monoclonal antibody use. Similar to nAb, individuals in the S-HT and S-A subgroups had significantly blunted increases in nucleocapsid binding Ab development from acute to post-infection, and significantly lower binding Ab levels compared to NS and non-



immunocompromised groups (Fig. 3e). Longitudinally, binding Ab levels in NS and non-immunocompromised groups plateaued around day 20-25 at a level of 1-1.5 log<sub>10</sub> IU/ml, while S-HT/S-A groups exhibited delayed development to a level below 1 log<sub>10</sub> IU/ml after day 50 (Fig. 3f).

## T Cell Responses

In a recent study, Apostolidis et al. demonstrated elevated spike-specific CD8<sup>+</sup> T cell responses in COVID-19 mRNA vaccinated participants with multiple sclerosis receiving anti-CD20 treatment compared to healthy controls<sup>30</sup>. However, it remains largely unknown if different types and levels of immunosuppression are associated with a similar T cell immunophenotype. To this end, we profiled the T cell effector function using enzyme-linked immunosorbent spot (ELISpot) and antigen-specific proliferation assay for a selected group of participants based on sample availability. The non-immunocompromised group had lower interferon gamma (IFN-γ) producing units per million cells upon stimulation at both blood draws (acute infection 0-14 days, and post-acute 15-60 days after symptom onset or first positive COVID-19 test) compared to both NS and S-A groups in response to both ancestral and variant-specific Spike peptide pools (Fig. 4a). Individuals in the S-A group tended to have the highest levels of CD4<sup>+</sup> and CD8<sup>+</sup> T cell proliferation upon spike peptide pool stimulation, especially compared to the S-HT and non-immunocompromised individuals (Fig. 4bc and Extended Fig. 4). In longitudinal analysis, the S-HT group showed poor functional CD4<sup>+</sup> and CD8<sup>+</sup> T cell proliferation, despite a comparable IFN-γ secretion level compared to the non-immunocompromised group (Fig. 4d). In contrast, the S-A group showed robust T cell proliferation over time, in response to both ancestral and variant-specific spike peptide pools compared to all other groups, suggestive of either an antigen-stimulated compensatory effect in the setting of B cell deficiency or a medication-related T cell priming.

## Discussion

Understanding viral and immune control characteristics of COVID-19 infection is crucial to our ability to care for immunocompromised individuals at greatest risk of persistent and severe infection. Moreover, it can guide public health interventions and shed light on vaccine development that protects immunocompromised individuals. In this study, we performed an in-depth virologic and immunologic evaluation of a cohort of immunocompromised and non-immunocompromised individuals. We demonstrated a hierarchy of immunocompromised conditions that increase the risk of delayed viral clearance and SARS-CoV-2 evolution. Furthermore, we identified the varied risk of persistent COVID-19 across immunosuppressive conditions and suppression of both B and T cell responses in those at the highest risk of persistent infection. Specifically, we found that individuals with a history of hematological malignancy and organ transplant demonstrated the greatest delay in viral clearance that may be mediated by suppression of both the B and T cell responses. In contrast, those with B cell immunodeficiency had an intermediate risk of chronic infection in the setting of an immune response showing compensatory heightened levels of SARS-CoV-2-specific T cell function.

Our cohort study confirmed findings from prior case reports and case series. In a review by Dioverti et al., the authors summarized cases of persistent COVID-19 lasting from approximately one month to one year<sup>31</sup>. These included a spectrum of immunocompromised hosts from individuals with solid organ transplants, hematological malignancy<sup>14,20,22,23,25,29,32-36</sup>, and autoimmune diseases receiving immunosuppressive therapies. However, immunocompromise is a broad spectrum and, until now it has not been clear which immunosuppressive conditions represent the greatest risk for persistent infection. The results of our study provide critical insight as to the hierarchy of risk for delayed SARS-CoV-2 RNA and culture clearance, and viral evolution. Specifically, we found that demonstrated that individuals with solid organ transplant and hematological malignancy are associated with the longest period

of viral RNA and culturable viral shedding, followed by severely immunocompromised participants with autoimmune conditions receiving B-cell depleted therapy and/or those with B cell deficiency. Participants with mild non-severe immunocompromise, such as those with autoimmune diseases receiving anti-tumor necrosis factor (TNF) treatment, had similar viral shedding dynamics to non-immunocompromised participants.

There have been several prior case reports of immunosuppressed individuals with chronic COVID-19 and accumulation of viral polymorphisms and drug resistance mutations<sup>13,14,21,27,34</sup>, but there has been little in the way of more systematic evaluation of viral evolution. In this study, we used S gene-specific deep sequencing to assess longitudinal viral evolution and diversity. Our results show that severe immunosuppression is associated with increased viral evolution and diversification. In addition, severe immunocompromised hosts had a greater risk of developing treatment-emergent resistance mutations to mAb therapy when compared to non-immunocompromised group participants. These findings highlight the potential for immunocompromised individuals to serve as a source for SARS-CoV-2 evolution and drug resistance, consistent with isolated reports of immunocompromised hosts implicated in the emergence of highly mutated SARS-CoV-2 variants<sup>13,15,16,24,28,37-40</sup>. It should be noted though that even within the category of severe immunocompromise, participants demonstrated a range of viral diversification and evolution patterns, and additional studies are needed to fully assess the drivers of accelerated viral evolution.

Another highlight of our study is our use of in-depth analysis of B and T cell responses, including SARS-CoV-2-specific neutralizing and binding antibody levels, as well as ELISpot and T cell proliferation studies. We noted lower levels of neutralizing antibody against both ancestral virus and variant virus in the severe immunocompromised group (less than 10-20% compared to non-immunocompromised individuals), after adjusting for vaccination doses, monoclonal

antibody use, and demographic confounders. Each additional dose of vaccination is associated with an approximately 1.5-fold increase in antibody levels in the whole cohort, underscoring the importance of adherence to COVID-19 vaccination recommendations. However, there is evidence that non-B-cell immunity may be sufficient for the clearance of SARS-CoV-2. Early in the pandemic, cases were reported of individuals with X-linked agammaglobulinemia who developed COVID-19 pneumonia, but subsequently recovered despite a lack of SARS-CoV-2-specific immunoglobulins<sup>41</sup>. In our study, the risk of chronic infection was highest in S-HT participants. This group of participants was found to have both suboptimal humoral and cell-mediated immune responses. The “near-normal” level of effector ELISpot responses in S-HT individuals, compared to the non-immunocompromised group, is the likely the result of exposure to high levels of SARS-CoV-2 antigen, while the reduced proliferation demonstrates compromised functionality. In contrast, the S-A participants had an even more robust SARS-CoV-2-specific proliferative T-cell responses than the non-immunocompromised group, indicating increased levels of functional SARS-CoV-2-specific CD8<sup>+</sup> T cell responses, which was associated with an intermediate risk of chronic infection. These results align with some intriguing reports that individuals receiving anti-CD20 treatment may demonstrate a stronger T-cell responses, in particular more robust activation-induced marker-positive CD8<sup>+</sup> T cell responses<sup>30</sup>. We found that both CD8<sup>+</sup> T cell response and CD4<sup>+</sup> T-cell responses, including proliferation in response to both ancestral and variant-specific spike peptides, were more pronounced in S-A group compared to other non-immunocompromised groups. Together with the results from Apostolidis et al.<sup>30</sup>, our results raise the question of whether individuals with B cell deficiencies may have a lower risk of persistent SARS-CoV-2 infection due to preserved T cell function, either as a compensatory mechanism or T cell priming by certain B cell-depleting therapies.

There are several limitations to this study. We included a relatively small number of individuals with malignant hematological conditions or transplant history, and we were able to obtain blood samples from only a subset of the participants to characterize their humoral and T-cell immunity. Larger studies are needed to provide greater precision as to extent of immune defect or immunosuppressive medication that may place patients at the greatest risk of chronic infection and viral evolution. We also did not analyze markers reflecting innate immunity, including soluble inflammatory markers and monocyte phenotypes. Our study focused on virologic and immunologic responses after COVID-19 and it is unclear how these may contribute to persistence and severity of symptoms. Furthermore, we only evaluated Spike-specific humoral and cellular immunity, while immunity targeting other structural or non-structural proteins has been shown to alter disease course<sup>42,43</sup>.

In conclusion, in this prospective cohort of well-characterized individuals with acute COVID-19, we demonstrated a correlation between a hierarchy of immunocompromised conditions and SARS-CoV-2 viral shedding, viral evolution, and adaptive immunity. Our results highlight the finding that the risk of chronic SARS-CoV-2 infection is not uniform across immunosuppressive conditions and provide clarity on which immunosuppression conditions predispose to delayed SARS-CoV-2 RNA and culture clearance, and viral evolution. The high risk populations identified in this study may benefit from targeted public health and additional therapeutic interventions. In addition, the results provide further insights on the humoral and cell-mediated immune correlates of viral clearance, which is crucial for the development of improved vaccines and future therapies.

## Methods

### Participant Enrollment and Sample Collection

We enrolled participants with a positive COVID-19 test in the Mass General Brigham Medical HealthCare System as part of the POST-Vaccination Viral Characteristics Study (POSITIVES)<sup>17,19</sup> in addition to one immunocompromised participant from our previous study. Each participant's medical record was reviewed for demographic data, immunosuppression status, and COVID-19 treatment history by board-certified clinicians. For the POSITIVES study, participants self-collected anterior nasal swabs every 2-3 days to a total of 6 samples over 2 weeks. Participants with immunocompromised conditions were offered to collect additional swabs when possible and were followed until they had two consecutive negative PCR tests. For this one immunocompromised participant reported previously<sup>13</sup>, nasopharyngeal swab was collected by healthcare providers. In a subset of participants who agreed to provide blood sample, the first blood draw was done generally before day 15 of symptom onset (acute phase) or first positive PCR or antigen test for COVID-19, and second blood draw between 15-60 days after (post-acute phase) (Supplementary Fig. 1). This study was approved by Mass General Brigham Institutional Review Board and all participants have signed informed consent upon entry to the study.

### Categorization for Immunocompromised Conditions

Immunocompromised participants were further categorized into the following groups: severe immunocompromised participants, which were further categorized into severe-hematological malignancy/transplant patients (S-HT), severe autoimmune patients (S-A, participants with autoimmune condition receiving B-cell targeting agents or B cell deficiency); and non-severe immunocompromised participants (NS). This categorization was based on a recent cohort study which demonstrated a hierarchy of antibody response to COVID-19 vaccinations in different medical conditions<sup>4,44</sup>. Detailed classification criteria were listed in Supplemental Table 1.

329

### 330 **SARS-CoV-2 Viral Load Assay**

331 SARS-CoV-2 viral RNA (vRNA) were quantified as described previously<sup>45</sup>. Briefly, virions were  
 332 pelleted from nasal swab fluid by centrifugation at 21,000g for 2 hours at 4°C. Trizol-LS Reagent  
 333 (Thermofisher Scientific) was added to the pellet, vortexed, and incubated on ice for 10 minutes.  
 334 Chloroform was added and the solution was vortexed before centrifugation at 21,000g for 15  
 335 minutes at 4°C. RNA was isolated from the aqueous layer by isopropanol precipitation and  
 336 eluted in DEPC-Treated water (Thermofisher Scientific). SARS-CoV-2 RNA copies were  
 337 quantified with an in-house viral load assay using the CDC 2019-nCoV\_N1 primer and probe set  
 338 (Integrated DNA Technologies). The efficiency of the RNA extraction and RT-qPCR  
 339 amplification was evaluated by quantifying the RCAS RNA recovered from each sample and the  
 340 two N1 controls. The importin-8 (IPO8) human housekeeping gene was also amplified and  
 341 evaluated as a measure of sample collection quality. Samples were run in triplicate wells for N1,  
 342 and in duplicate wells for RCAS and IPO8.

343

### 344 **SARS-CoV-2 Viral Culture Assay**

345 Viral culture was performed as previously reported<sup>17</sup>. Vero-E6 cells (ATCC) maintained in  
 346 DMEM(Corning) supplemented with HEPES (Corning), 1X Penicillin (100 IU/mL)/Streptomycin  
 347 (100 µg/ml) (Corning), 1X Glutamine (Glutamax, Thermofisher Scientific) and 10% FBS  
 348 (MilliporeSigma) were plated 16-20 hours before infection. Each sample consisting of nasal  
 349 swab fluid was thawed on ice and filtered through a Spin-X 0.45 µm filter (Corning) at 10,000 xg  
 350 for 5 minutes. Before infection the media was changed to DMEM supplemented with HEPES,  
 351 1X Antibiotic/Antimycotic (ThermoFisher), 1X Glutamine, 2% FBS and 5 µg/mL of polybrene  
 352 (Santa Cruz Biotechnologies). Each filtered sample was then used to inoculate Vero-E6 cells by  
 353 spinfection (2,000x g for 1 hour at 37°C). Each condition was plated in quadruplicate wells in 1:5

dilutions across half the plate. The plates were observed at 7-days post-infection using a light microscope to check for cytopathogenic effect (CPE) and a median tissue culture infectious dose (TCID<sub>50</sub>) was calculated for each sample.

## Neutralizing Antibody Responses

Neutralizing activity against SARS-CoV-2 pseudovirus was measured using a single-round infection assay in 293T/ACE2 target cells<sup>18</sup>. Pseudotyped virus particles were produced in 293T/17 cells (ATCC) by co-transfection of plasmids encoding codon-optimized full-length Spike (ancestral-D614G, Delta, Omicron-BA.1, Omicron-BA.2, Omicron-BA.4/5), packaging plasmid pCMV ΔR8.2, and luciferase reporter plasmid pHR' CMV-Luc. Packaging and luciferase plasmids were kindly provided by Dr. Barney Graham (NIH, Vaccine Research Center). The 293T cell line stably overexpressing the human ACE2 cell surface receptor protein was kindly provided by Drs. Michael Farzan and Huihui Ma (The Scripps Research Institute). For neutralization assays, serial dilutions of patient sera were performed in duplicate followed by addition of pseudovirus. Pooled serum samples from convalescent COVID-19 patients or pre-pandemic normal healthy serum (NHS) were used as positive and negative controls, respectively. Plates were incubated for 1 hour at 37°C followed by addition of 293/ACE2 target cells (1x10<sup>4</sup>/well). Wells containing cells + pseudovirus (without sample) or cells alone acted as positive and negative infection controls, respectively. Assays were harvested on day 3 using Promega BrightGlo luciferase reagent and luminescence detected with a Promega GloMax luminometer. Titers are reported as the dilution of serum that inhibited 50% virus infection (ID<sub>50</sub> titer). Pseudovirus-based neutralization assays were conducted using ancestral Spike protein, as well as Delta- and Omicron- (BA.1, BA.2, or BA.4/5) Spike. Anti-variant neutralizing antibody level (nAb) was determined based on the viral strain each participant was infected with (either by sequencing or in small proportion, imputed by time of infection when specific strain was prevalent).



380

## 381 **Nucleocapsid binding antibody assay**

382 Binding antibody against Nucleocapsid protein was measured using Coronavirus Ig Total

383 Human 11-Plex ProcartaPlex™ Panel (Thermal Fisher) according to the manufacturer's

384 instruction.

385

## 386 **T Cell Enzyme-linked immunosorbent spot (ELISpot) Assay**

387 Interferon (IFN)- $\gamma$  ELISpot assay was reported in our previous study and were performed

388 according to the manufacturer's instructions (Mabtech)<sup>46</sup>. Briefly, peripheral blood mononuclear

389 cells (PBMCs) were incubated with SARS-CoV-2 peptide pools (MGH Peptide Core) at a final

390 concentration of 0.5 $\mu$ g/ml for 16–18h (100,000-200,000 cells per test). Anti-CD3 (Clone OKT3,

391 Biolegend, 0.5 $\mu$ g/mL) and anti-CD28 Ab (Clone CD28.2, Biolegend, 0.5 $\mu$ g/mL) were used as

392 positive controls. To quantify antigen-specific responses, mean spots of the DMSO negative

393 control wells were subtracted from the positive wells. The results were expressed as spot-

394 forming units (SFU) per 10<sup>6</sup> PBMCs. Responses were considered positive if the results were

395 >5 SFU/10<sup>6</sup> PBMCs following control subtraction. If negative DMSO control wells had >30

396 SFU/10<sup>6</sup> PBMCs or if positive control wells (anti-CD3/anti-CD28 stimulation) did not have >1000

397 spot-forming units, the results were deemed invalid and excluded from further analysis.

398

## 399 **T Cell Proliferation Assay**

400 T Cell proliferation assay was reported previously<sup>46</sup>. Briefly, PBMCs were incubated in PBS with

401 0.5  $\mu$ M carboxyfluorescein succinimidyl ester (CFSE; Life Technologies) or CellTrace™ Far Red

402 (CTFR, Invitrogen) at 37°C for 20 min. Then they were washed and resuspended at 0.5-1  $\times$

403 10<sup>6</sup>/mL and plated into 96-well U-bottom plates (Corning) in 200  $\mu$ L of media. Peptide pools

404 were added at a final concentration of 0.5  $\mu$ g/mL, followed by incubation at 37°C, 5% CO<sub>2</sub> for six

405 days. The PBMC staining antibody panels are in Supplementary Materials. Cells were washed

and fixed in 2% paraformaldehyde prior to flow cytometric analysis on a BD LSR II (BD Biosciences). A positive proliferation response was defined as a percentage of CD3<sup>+</sup>CD4<sup>+</sup> or CD3<sup>+</sup>CD8<sup>+</sup> CFSE<sup>low</sup> or CTFR<sup>low</sup> cells with at least 1.5x greater than the highest of two negative-control wells and greater than 0.2% CFSE<sup>low</sup> or CTFR<sup>low</sup> cells in magnitude following background subtraction.

## **SARS-CoV-2 S-gene Sequencing**

SARS-CoV-2 viral RNA (vRNA) isolation as described previously<sup>45</sup>. RNA was converted to cDNA using Superscript IV reverse transcriptase (Invitrogen) as per manufacturer's instructions). Spike (S) gene amplification was performed using a nested PCR strategy with in-house designed primer sets targeting codons 1–814 of the Spike as previously described<sup>28</sup>. Further, PCR products from different individuals were pooled, and Illumina library construction was performed using the Nextera XT library prep kit (Illumina). Sequencing was performed on the Illumina MiSeq platform and deep sequencing data analysis was carried out using the Stanford Coronavirus Antiviral & Resistance Database (CoVDB) platform (<https://covdb.stanford.edu/sierra/sars2/by-reads/?cutoff=0.01&mixrate=0.01>)<sup>47</sup>. Input FASTQ sequence alignment with Wuhan-Hu-1 reference was done using MiniMap2 version 2.22 in CodFreq pipeline (<https://github.com/hivdb/codfreq>). The output of MiniMap2, an aligned SAM file, is converted to a CodFreq file by an in-house written Python script using a PySam library (version: 0.18.0) and further analyzed with the CoVDB. PCR and sequencing runs were performed once with the appropriate positive and negative controls. For S gene analysis, amino acid variants were then called at the codon level using perl code and used for resistance interpretation with a 1% limit of detection. The accuracy of the deep sequencing platforms was evaluated with a control library of clonal SARS-CoV-2 sequences mixed at known concentrations as described previously<sup>48</sup>. Mutations detected by next-generation sequencing at <20% of the viral population were labelled as 'low-frequency' variants as they would largely be missed by traditional Sanger sequencing. A

minimum average of 500x sequencing coverage per sample was required for variant calling. SARS-COV-2 variant calling was done using 3 different variant calling platforms, namely, CoVDB<sup>47</sup>, Scorpio call v1.2.123 (<https://pangolin.cog-uk.io/>), and Nextclade v.1.13.2 (<https://clades.nextstrain.org/>)<sup>49</sup>. Mutation locations are graphically represented in heatmap for Spike and in Circos plots for whole genome.

### **Single nucleotide variation, and genetic diversity analysis**

For assessing intrahost single nucleotide variation (iSNV), data from only those participants were included for whom sequence data from baseline and at least one follow-up time point were available. SNV analysis was performed using PASEq SARS-CoV-2 pipeline ([www.paseq.org](http://www.paseq.org)). Briefly, raw sequence files were quality filtered and adapter-trimmed using trimmomatic (v0.30). Contaminating sequences were filtered out using BBDMap Suite (v35.76). Duplicated reads were detected using fastuniq (v1.1). High quality non-redundant reads were then aligned to SARS-CoV-2 Wuhan reference (NC\_045512.2) using Bowtie2 (v.2.3.2). Resulting alignments were processed with samtools (v.1.2) and iVar (v1.4.2) to obtain nucleotide variant VCF files. Nucleotide variants present at 100% frequency of the total viral population at all time points indicative of lineage defining mutations were excluded from the iSNV analysis. Genetic diversity between multiple sequences of an individual were assessed by average pairwise distance in MEGA both at the nucleotide and amino-acid level.

### **Statistical Analysis**

Categorical variables were summarized using total number and percentage and between-group differences were evaluated using either chi-squared test or Fisher's exact test when appropriate. Continuous variables were summarized with median and interquartile ranges and compared with non-parametric methods (Wilcoxon rank-sum test to compare two groups and Dunn's test with Benjamini-Hochberg adjustment to compare three or more groups). Within

458 group comparison was conducted using paired Wilcoxon signed-rank test without adjustment for  
459 multiple comparisons. We also used generalized estimating equation (GEE) with Gaussian  
460 estimation to evaluate between-group differences accounting for repeated measurement during  
461 longitudinal follow-up. R (4.3.0) was used for statistical analyses. Two-tailed tests were used for  
462 all the analyses and  $P < 0.05$  was considered statistically significant unless specified otherwise.

# References

1. El Sahly, H.M., *et al.* Efficacy of the mRNA-1273 SARS-CoV-2 Vaccine at Completion of Blinded Phase. *N Engl J Med* **385**, 1774-1785 (2021).
2. Moreira, E.D., Jr., *et al.* Safety and Efficacy of a Third Dose of BNT162b2 Covid-19 Vaccine. *N Engl J Med* **386**, 1910-1921 (2022).
3. Watson, O.J., *et al.* Global impact of the first year of COVID-19 vaccination: a mathematical modelling study. *The Lancet. Infectious diseases* **22**, 1293-1302 (2022).
4. Haidar, G., *et al.* Prospective Evaluation of Coronavirus Disease 2019 (COVID-19) Vaccine Responses Across a Broad Spectrum of Immunocompromising Conditions: the COVID-19 Vaccination in the Immunocompromised Study (COVICS). *Clin Infect Dis* **75**, e630-e644 (2022).
5. Wieske, L., *et al.* Humoral responses after second and third SARS-CoV-2 vaccination in patients with immune-mediated inflammatory disorders on immunosuppressants: a cohort study. *The Lancet. Rheumatology* **4**, e338-e350 (2022).
6. Kelly, J.D., *et al.* Incidence of Severe COVID-19 Illness Following Vaccination and Booster With BNT162b2, mRNA-1273, and Ad26.COV2.S Vaccines. *Jama* **328**, 1427-1437 (2022).
7. Agrawal, U., *et al.* Severe COVID-19 outcomes after full vaccination of primary schedule and initial boosters: pooled analysis of national prospective cohort studies of 30 million individuals in England, Northern Ireland, Scotland, and Wales. *Lancet (London, England)* **400**, 1305-1320 (2022).
8. Planas, D., *et al.* Reduced sensitivity of SARS-CoV-2 variant Delta to antibody neutralization. *Nature* **596**, 276-280 (2021).
9. Hoffmann, M., *et al.* SARS-CoV-2 variant B.1.617 is resistant to bamlanivimab and evades antibodies induced by infection and vaccination. *Cell Reports* **36**(2021).
10. Wang, Q., *et al.* Antibody evasion by SARS-CoV-2 Omicron subvariants BA.2.12.1, BA.4 and BA.5. *Nature* **608**, 603-608 (2022).
11. Weigang, S., *et al.* Within-host evolution of SARS-CoV-2 in an immunosuppressed COVID-19 patient as a source of immune escape variants. *Nat Commun* **12**, 6405 (2021).
12. Cele, S., *et al.* SARS-CoV-2 prolonged infection during advanced HIV disease evolves extensive immune escape. *Cell Host Microbe* **30**, 154-162 e155 (2022).
13. Choi, B., *et al.* Persistence and Evolution of SARS-CoV-2 in an Immunocompromised Host. *N Engl J Med* **383**, 2291-2293 (2020).

14. Hensley, M.K., *et al.* Intractable Coronavirus Disease 2019 (COVID-19) and Prolonged Severe Acute Respiratory Syndrome Coronavirus 2 (SARS-CoV-2) Replication in a Chimeric Antigen Receptor-Modified T-Cell Therapy Recipient: A Case Study. *Clin Infect Dis* **73**, e815-e821 (2021).
15. Harari, S., *et al.* Drivers of adaptive evolution during chronic SARS-CoV-2 infections. *Nat Med* **28**, 1501-1508 (2022).
16. Choudhary, M.C., Crain, C.R., Qiu, X., Hanage, W. & Li, J.Z. Severe Acute Respiratory Syndrome Coronavirus 2 (SARS-CoV-2) Sequence Characteristics of Coronavirus Disease 2019 (COVID-19) Persistence and Reinfection. *Clin Infect Dis* **74**, 237-245 (2022).
17. Boucau, J., *et al.* Duration of Shedding of Culturable Virus in SARS-CoV-2 Omicron (BA.1) Infection. *N Engl J Med* **387**, 275-277 (2022).
18. Seaman, M.S., *et al.* Vaccine breakthrough infection leads to distinct profiles of neutralizing antibody responses by SARS-CoV-2 variant. *JCI Insight* **7**(2022).
19. Siedner, M.J., *et al.* Duration of viral shedding and culture positivity with postvaccination SARS-CoV-2 delta variant infections. *JCI Insight* **7**(2022).
20. Avanzato, V.A., *et al.* Case Study: Prolonged Infectious SARS-CoV-2 Shedding from an Asymptomatic Immunocompromised Individual with Cancer. *Cell* **183**, 1901-1912.e1909 (2020).
21. Chaguza, C., *et al.* Accelerated SARS-CoV-2 intrahost evolution leading to distinct genotypes during chronic infection. *Cell reports. Medicine* **4**, 100943 (2023).
22. Bailly, B., *et al.* Persistent Coronavirus Disease 2019 (COVID-19) in an Immunocompromised Host Treated by Severe Acute Respiratory Syndrome Coronavirus 2 (SARS-CoV-2)-Specific Monoclonal Antibodies. *Clin Infect Dis* **74**, 1706-1707 (2022).
23. Truffot, A., *et al.* SARS-CoV-2 Variants in Immunocompromised Patient Given Antibody Monotherapy. *Emerging infectious diseases* **27**, 2725-2728 (2021).
24. Gupta, A., *et al.* Host immunological responses facilitate development of SARS-CoV-2 mutations in patients receiving monoclonal antibody treatments. *The Journal of clinical investigation* **133**(2023).
25. Baang, J.H., *et al.* Prolonged Severe Acute Respiratory Syndrome Coronavirus 2 Replication in an Immunocompromised Patient. *J Infect Dis* **223**, 23-27 (2021).
26. Bronstein, Y., *et al.* Evolution of spike mutations following antibody treatment in two immunocompromised patients with persistent COVID-19 infection. *Journal of medical virology* **94**, 1241-1245 (2022).

- 531 27. Gonzalez-Reiche, A.S., *et al.* Sequential intrahost evolution and onward transmission of  
532 SARS-CoV-2 variants. *Nat Commun* **14**, 3235 (2023).
- 533 28. Choudhary, M.C., *et al.* Emergence of SARS-CoV-2 escape mutations during  
534 Bamlanivimab therapy in a phase II randomized clinical trial. *Nature microbiology* **7**,  
535 1906-1917 (2022).
- 536 29. Kemp, S.A., *et al.* SARS-CoV-2 evolution during treatment of chronic infection. *Nature*  
537 **592**, 277-282 (2021).
- 538 30. Apostolidis, S.A., *et al.* Cellular and humoral immune responses following SARS-CoV-2  
539 mRNA vaccination in patients with multiple sclerosis on anti-CD20 therapy. *Nat Med* **27**,  
540 1990-2001 (2021).
- 541 31. Dioverti, V., Salto-Alejandre, S. & Haidar, G. Immunocompromised Patients with  
542 Protracted COVID-19: a Review of "Long Persisters". *Current transplantation reports*, 1-  
543 10 (2022).
- 544 32. Nussenblatt, V., *et al.* Yearlong COVID-19 Infection Reveals Within-Host Evolution of  
545 SARS-CoV-2 in a Patient With B-Cell Depletion. *J Infect Dis* **225**, 1118-1123 (2022).
- 546 33. Aydillo, T., *et al.* Shedding of Viable SARS-CoV-2 after Immunosuppressive Therapy for  
547 Cancer. *N Engl J Med* **383**, 2586-2588 (2020).
- 548 34. Gandhi, S., *et al.* De novo emergence of a remdesivir resistance mutation during  
549 treatment of persistent SARS-CoV-2 infection in an immunocompromised patient: a case  
550 report. *Nat Commun* **13**, 1547 (2022).
- 551 35. Gordon, C.L., *et al.* Defective Severe Acute Respiratory Syndrome Coronavirus 2  
552 Immune Responses in an Immunocompromised Individual With Prolonged Viral  
553 Replication. *Open forum infectious diseases* **8**, ofab359 (2021).
- 554 36. Monrad, I., *et al.* Persistent Severe Acute Respiratory Syndrome Coronavirus 2 Infection  
555 in Immunocompromised Host Displaying Treatment Induced Viral Evolution. *Open forum*  
556 *infectious diseases* **8**, ofab295 (2021).
- 557 37. Braun, K.M., *et al.* Acute SARS-CoV-2 infections harbor limited within-host diversity and  
558 transmit via tight transmission bottlenecks. *PLoS pathogens* **17**, e1009849 (2021).
- 559 38. Ko, K.K.K., *et al.* Emergence of SARS-CoV-2 Spike Mutations during Prolonged  
560 Infection in Immunocompromised Hosts. *Microbiology spectrum* **10**, e0079122 (2022).
- 561 39. Lythgoe, K.A., *et al.* SARS-CoV-2 within-host diversity and transmission. *Science (New*  
562 *York, N.Y.)* **372**(2021).
- 563 40. Valesano, A.L., *et al.* Temporal dynamics of SARS-CoV-2 mutation accumulation within  
564 and across infected hosts. *PLoS Pathog* **17**, e1009499 (2021).



41. Soresina, A., *et al.* Two X-linked agammaglobulinemia patients develop pneumonia as COVID-19 manifestation but recover. *Pediatric allergy and immunology : official publication of the European Society of Pediatric Allergy and Immunology* **31**, 565-569 (2020).
42. Dangi, T., *et al.* Improved control of SARS-CoV-2 by treatment with nucleocapsid-specific monoclonal antibody. *The Journal of clinical investigation*, e162282 [Online ahead of print] (2022).
43. Kundu, R., *et al.* Cross-reactive memory T cells associate with protection against SARS-CoV-2 infection in COVID-19 contacts. *Nat Commun* **13**, 80 (2022).
44. Maneikis, K., *et al.* Immunogenicity of the BNT162b2 COVID-19 mRNA vaccine and early clinical outcomes in patients with haematological malignancies in Lithuania: a national prospective cohort study. *The Lancet Haematology* **8**, e583-e592 (2021).
45. Fajnzylber, J., *et al.* SARS-CoV-2 viral load is associated with increased disease severity and mortality. *Nat Commun* **11**, 5493 (2020).
46. Nathan, A., *et al.* Structure-guided T cell vaccine design for SARS-CoV-2 variants and sarbecoviruses. *Cell* **184**, 4401-4413.e4410 (2021).
47. Tzou, P.L., Tao, K., Pond, S.L.K. & Shafer, R.W. Coronavirus Resistance Database (CoV-RDB): SARS-CoV-2 susceptibility to monoclonal antibodies, convalescent plasma, and plasma from vaccinated persons. *PloS one* **17**, e0261045 (2022).
48. Li, J.Z., *et al.* Impact of pre-existing drug resistance on risk of virological failure in South Africa. *The Journal of antimicrobial chemotherapy* **76**, 1558-1563 (2021).
49. Aksamentov, I., Roemer, C., Hodcroft, E.B. & Neher, R.A. Nextclade: clade assignment, mutation calling and quality control for viral genomes. *The Journal of Open Source Software* **6**, 3773 (2021).



## Figure Legends

### Figure 1. Kinetics of SARS-CoV-2 viral RNA and culturable virus among different

**immunocompromised groups.** **a**, Upper respiratory viral load decay. Lower level of quantification (LLOQ) is 10 copies/ml. **b**, Kaplan-Meier estimates of upper respiratory viral clearance (viral load below LLOQ). **c**, Upper respiratory culturable virus dynamics (50% Tissue Culture Infectious Dose [TCID<sub>50</sub>]). **d**, Kaplan-Meier estimates of upper respiratory culturable virus clearance.

### Figure 2. SARS-CoV-2 intra-host mutations among different immunocompromise groups.

**a**, Number of intra-host single-nucleotide variants (iSNVs) among severe (S-HT in red and S-A in green), non-severe immunocompromised and non-immunocompromised (None) groups. **b**, Nucleotide average pairwise distance (APD) among severe (S-HT in red and S-A in green), non-severe immunocompromised (NS) and non-immunocompromised (None) groups. **c**, Participants with any nucleotide changes during follow-up. **d**, Heat map showing distribution of Spike polymorphisms from participants receiving mAb treatment. Each row represents one participant, while x axis shows amino acid positions in the Spike gene. Different domains of Spike are shown at the top. Colors indicate frequency of polymorphisms, with blue indicating the lowest value and red indicating the highest value in the scale. Participants in different study groups are separated by a red horizontal line. **e**, Proportion of mAb resistance emergence amongst those treated with mAbs, categorized by those with severe or non-severe/no immunosuppression. Comparison of iSNV and APD between groups were done using using Dunn's test with Benjamini-Hochberg P value adjustment. Fisher's exact test was used to calculate significance between participants with and without viral evolution and further, in participants with and without mAb treatment specific resistance mutations. Only significant P values are shown. NTD, N-terminal domain; RBD, receptor binding domain; RBM, receptor binding motif; S1, subunit 1; S2, subunit 2.

617

618 **Figure 3. Neutralizing antibody (nAb) and Nucleocapsid binding antibody levels among**

619 **different immunocompromised groups. a**, nAb levels (50% inhibitory dilution [ID<sub>50</sub>]) against

620 ancestral Spike protein. **b**, nAb levels against variant-specific Spike protein. **c** and **d**,

621 Longitudinal trajectory of nAb in different immunocompromise groups, including (**c**) or excluding

622 (**d**) monoclonal antibody use. **e**, binding antibody levels against Nucleocapsid protein. **f**,

623 Longitudinal trajectory of binding antibody in different immunocompromise groups. Comparison

624 between different immunocompromise groups at the same time point was performed using

625 Dunn's test with Benjamini-Hochberg P value adjustment. Comparison of longitudinal antibody

626 changes for participants with two blood draws was performed using the pairwise Wilcoxon rank

627 sum test with Benjamini-Hochberg P value adjustment. Only significant P values were shown.

628 Tukey boxplot was used to summarize antibody levels. Generalized additive model was used to

629 evaluate the trend of antibody development with 95% confidence intervals in the shaded area.

630 Lines between two timepoints indicate the same participants with two blood draws. S-HT,

631 severe hematologic-oncology/transplant; S-A, severe autoimmune/B-cell deficient; NS, non-

632 severe. Severe group included both S-HT and S-A as they had comparable antibody levels at

633 multiple time points.

634

635 **Figure 4. Spike-specific T levels among different immunocompromised groups. a**,

636 enzyme-linked immunosorbent spot (ELIspot) assays using peptide pools derived from

637 ancestral and variant-specific Spike protein. **b**, **c**, CD4<sup>+</sup> T cell (b) and CD8<sup>+</sup> T cell proliferation

638 (c) upon stimulation of ancestral- and variant-specific Spike peptide pools. **d**, Longitudinal

639 trajectory of Spike-specific T levels in different immunocompromise groups. Comparison

640 between different immunocompromise groups at the same time point was performed using

641 Dunn's test with Benjamini-Hochberg P value adjustment. Comparison of longitudinal antibody

642 changes for participants with two blood draws was performed using the pairwise Wilcoxon rank

sum test with Benjamini-Hochberg P value adjustment. Only significant P values were shown. Tukey boxplot was used to summarize antibody levels. Generalized additive model was used to evaluate the trend of antibody development with 95% confidence intervals in the shade area. Lines between two timepoints indicate the same participants with two blood draws.

**Extended Figure 1. Detectable SARS-CoV-2 viral RNA (a) and culturable SARS-CoV-2 virus (b) beyond 30 days after symptom onset or first positive PCR/antigen tests, supplemental to Fig. 1.** Fisher's exact test was used to calculate the P values.

**Extended Figure 2. a,** SARS-CoV-2 intrahost mutations at the amino acid level among different immunocompromise groups. **b,** Heat map showing distribution of Spike polymorphisms from participants receiving mAb treatment longitudinally, supplemental to Fig. 2. In the heatmap, y axis indicates participants' ID (PID) followed by sequential numbers of sample collection, while x axis shows amino acid positions in the Spike gene. Different domains of Spike are shown at the top. Colors indicate frequency of polymorphisms, with blue indicating the lowest value and red indicating the highest value in the scale. Participants in different study groups are separated by a red horizontal line. mAb resistance mutations are shown by red dotted box.

**Extended Figure 3. Severe immunocompromise is associated with lower neutralizing antibody levels, supplemental to Fig. 3.** Generalized estimation equation to account for longitudinal repeated measurements was used to estimate the association between immunocompromise groups and neutralizing antibody levels against ancestral SARS-CoV-2 Spike protein **(a)** and variant-specific Spike protein **(b)**. Monoclonal antibody (mAb) use, weeks since symptom onset or first positive PCR/antigen, numbers of vaccinations before enrollment, sex, and age were adjusted for in these models.

669 **Extended Figure 4. Representative T cell proliferation assay gating scheme,**  
 670 **supplemental to Fig. 4.** CD4<sup>+</sup> and CD8<sup>+</sup> T cell proliferation results from representative  
 671 participants in each immunocompromise group are shown. Non-immunocompromised group,  
 672 ID=261 (Omicron, BA.1); Non-severe group (NS), ID= 768 (Omicron, BF.5); Severe-  
 673 autoimmune/B-cell deficient (S-A), ID=534 (Omicron, BA.2); Severe- hematological  
 674 malignancy/transplant (S-HT), ID= 245 (Delta, B.1.617.2).

Table 1. Demographic and clinical information.

|                                                    | Immunocompromised<br>(N=56) | Non-Immunocompromised<br>(N=184) | Total (N=240) | P value |
|----------------------------------------------------|-----------------------------|----------------------------------|---------------|---------|
| Sex, n (%)                                         |                             |                                  |               | 0.2     |
| Female                                             | 32 (57.1%)                  | 126 (68.5%)                      | 158 (65.8%)   |         |
| Male                                               | 24 (42.9%)                  | 58 (31.5%)                       | 82 (34.2%)    |         |
| Age, Median (Q1, Q3)                               | 55 (45, 67)                 | 46 (33, 59)                      | 49 (34-60)    | 0.001   |
| Race, n (%)                                        |                             |                                  |               | 0.8     |
| Asian                                              | 1 (1.8)                     | 10 (5.4)                         | 11 (4.6)      |         |
| Black or AA                                        | 5 (8.9)                     | 19 (10.3)                        | 24 (10.0)     |         |
| Other/Unknown                                      | 5 (8.9)                     | 16 (8.7)                         | 21 (8.8)      |         |
| White                                              | 45 (80.4)                   | 139 (75.5)                       | 184 (76.7)    |         |
| Ethnicity                                          |                             |                                  |               | 0.5     |
| Hispanic or Latino                                 | 5 (8.9)                     | 17 (9.2)                         | 22 (9.2)      |         |
| Not Hispanic or Latino                             | 47 (83.9)                   | 143 (77.7)                       | 190 (79.2)    |         |
| Other/Unknown                                      | 4 (7.1)                     | 24 (13.0)                        | 28 (11.7)     |         |
| Inpatient, n (%)                                   | 7 (12.5)                    | 8 (4.3)                          | 15 (6.2)      | 0.051   |
| Number of vaccinations,<br>median number, (Q1, Q3) | 3 (3-4)                     | 3 (2-3)                          | 3 (2-4)       | <0.001  |
| mAb use, n (%)                                     | 24* (42.9)                  | 10 (5.4)                         | 34 (14.2)     | <0.001  |
| Antiviral use, n (%)                               | 40 (71.4)                   | 57 (31.0)                        | 97 (40.4)     | <0.001  |
| Immunocompromise group, n (%)                      |                             |                                  |               | <0.001  |
| S-HT                                               | 12 (21.4)                   | 0 (0.0)                          | 12 (5.0)      |         |
| S-A                                                | 13 (23.2)                   | 0 (0.0)                          | 13 (5.4)      |         |
| NS                                                 | 31 (55.4)                   | 0 (0.0)                          | 31 (12.9)     |         |
| None                                               | 0 (0.0)                     | 184 (100.0)                      | 184 (76.7)    |         |
| Symptom duration,<br>median days** (Q1, Q3)        | 5 (4, 7)                    | 4 (3, 6)                         | 4 (3, 6)      | 0.04    |
| Variant***                                         |                             |                                  |               | <0.001  |
| Delta                                              | 3 (5.4)                     | 43 (23.4)                        | 46 (19.2)     |         |
| Omicron                                            | 48 (85.7)                   | 137 (74.5)                       | 185 (77.1)    |         |
| Other/Unknown                                      | 5 (8.9)                     | 4 (2.2)                          | 9 (3.8)       |         |

Q1 and Q3, quartile 1 and quartile 3; AA, African American; mAb, monoclonal antibody; S-HT, severe with malignant hematology or transplant history; S-A, severe autoimmune/B-cell deficient; NS, non-severe immunocompromising condition.

\*, four participants received Mab after blood draws.

\*\*, Symptom duration indicates the duration between symptom onset (patient report or first positive test if asymptomatic screening) and first nasal swab collected by the study group.

\*\*\*, Variant information was obtained by either Spike or whole genome sequencing or by epidemiological information (time period when the participant was infected).

Table 2. Association between immunocompromise groups and SARS-CoV-2 viral decay.

| Hazard ratio for SARS-CoV-2 viral RNA clearance        |                  |        |                  |       |
|--------------------------------------------------------|------------------|--------|------------------|-------|
| Group                                                  | HR (95% CI)      | P      | aHR (95% CI)     | P     |
| None (Reference)                                       |                  |        |                  |       |
| S-HT                                                   | 0.24 (0.10-0.57) | 0.001  | 0.35 (0.13-0.91) | 0.03  |
| S-A                                                    | 0.64 (0.34-1.22) | 0.2    | 0.75 (0.34-1.67) | 0.5   |
| NS                                                     | 0.82 (0.54-1.24) | 0.4    | 0.93 (0.59-1.47) | 0.7   |
| Hazard ratio for SARS-CoV-2 culturable virus clearance |                  |        |                  |       |
| Group                                                  | HR (95% CI)      | P      | aHR (95% CI)     | P     |
| None (Reference)                                       |                  |        |                  |       |
| S-HT                                                   | 0.28 (0.14-0.56) | 0.0004 | 0.34 (0.15-0.76) | 0.009 |
| S-A                                                    | 0.55 (0.29-1.04) | 0.07   | 0.55 (0.27-1.14) | 0.1   |
| NS                                                     | 1.07 (0.73-1.58) | 0.7    | 1.30 (0.86-1.99) | 0.2   |

HR, hazard ratio; aHR, adjusted hazard ratio; CI, confidence interval.

Age, sex at birth, race, ethnicity, number of vaccinations, monoclonal use, and antiviral use were adjusted for in the multivariate models.

Fig.1

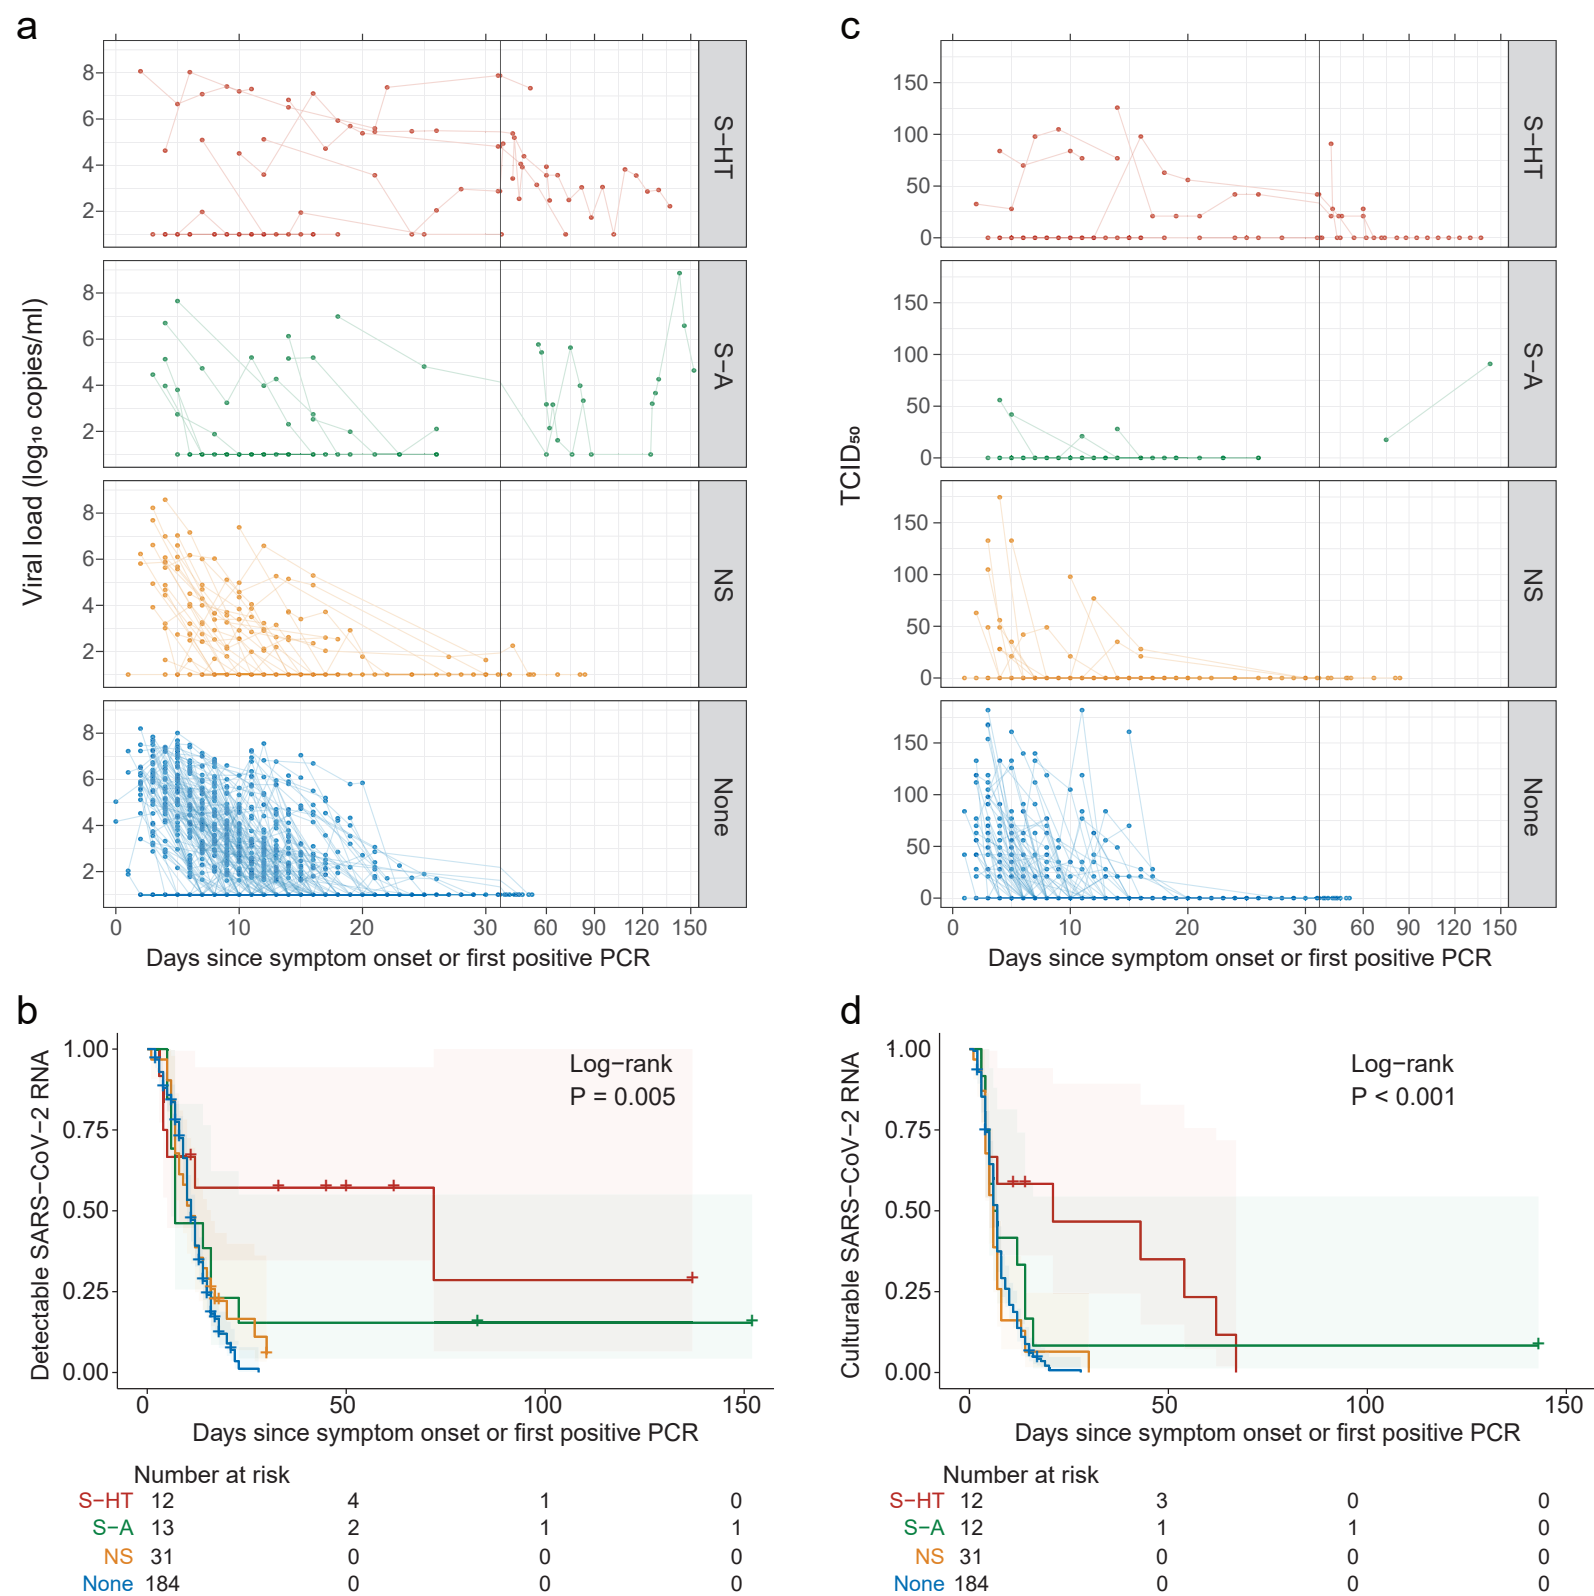

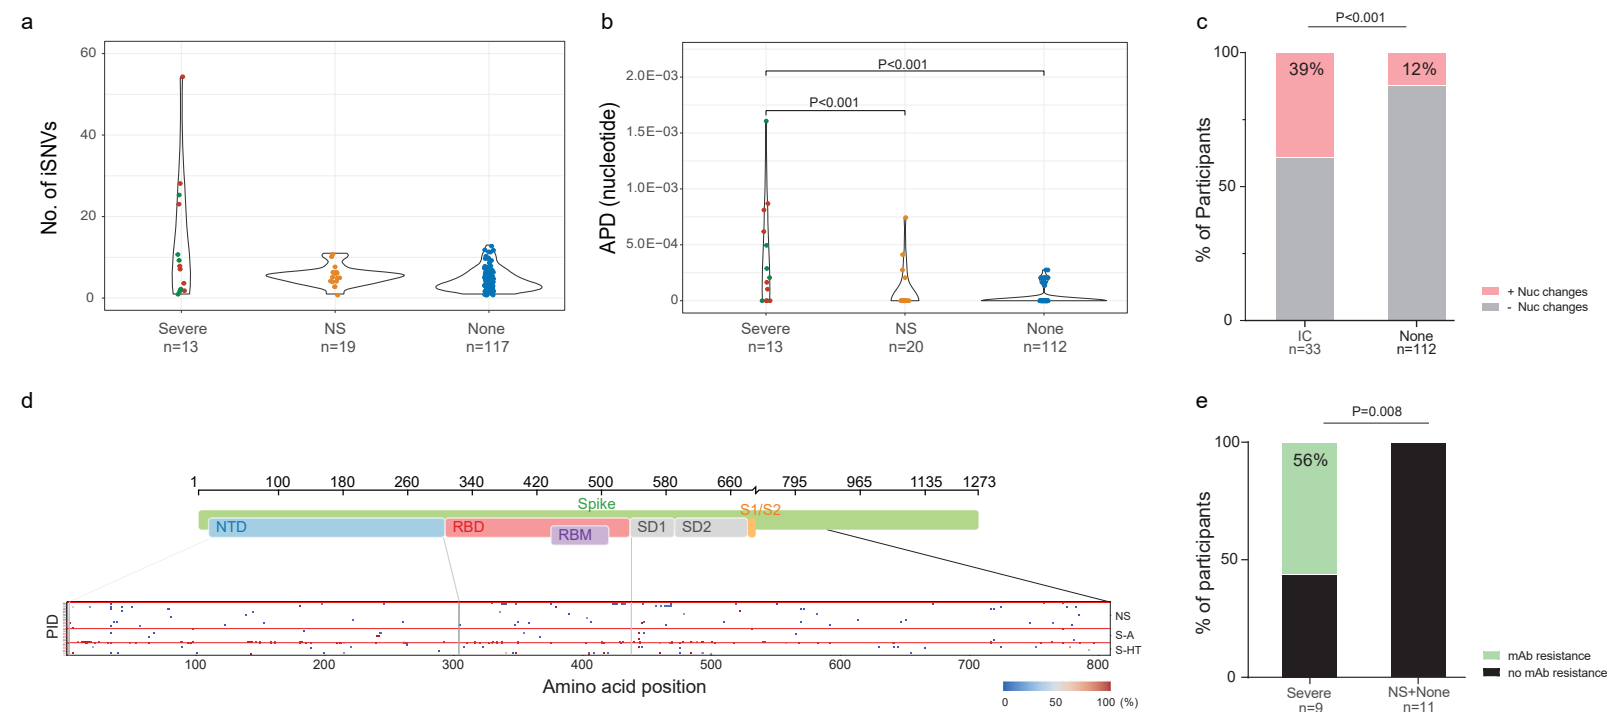



Fig. 3

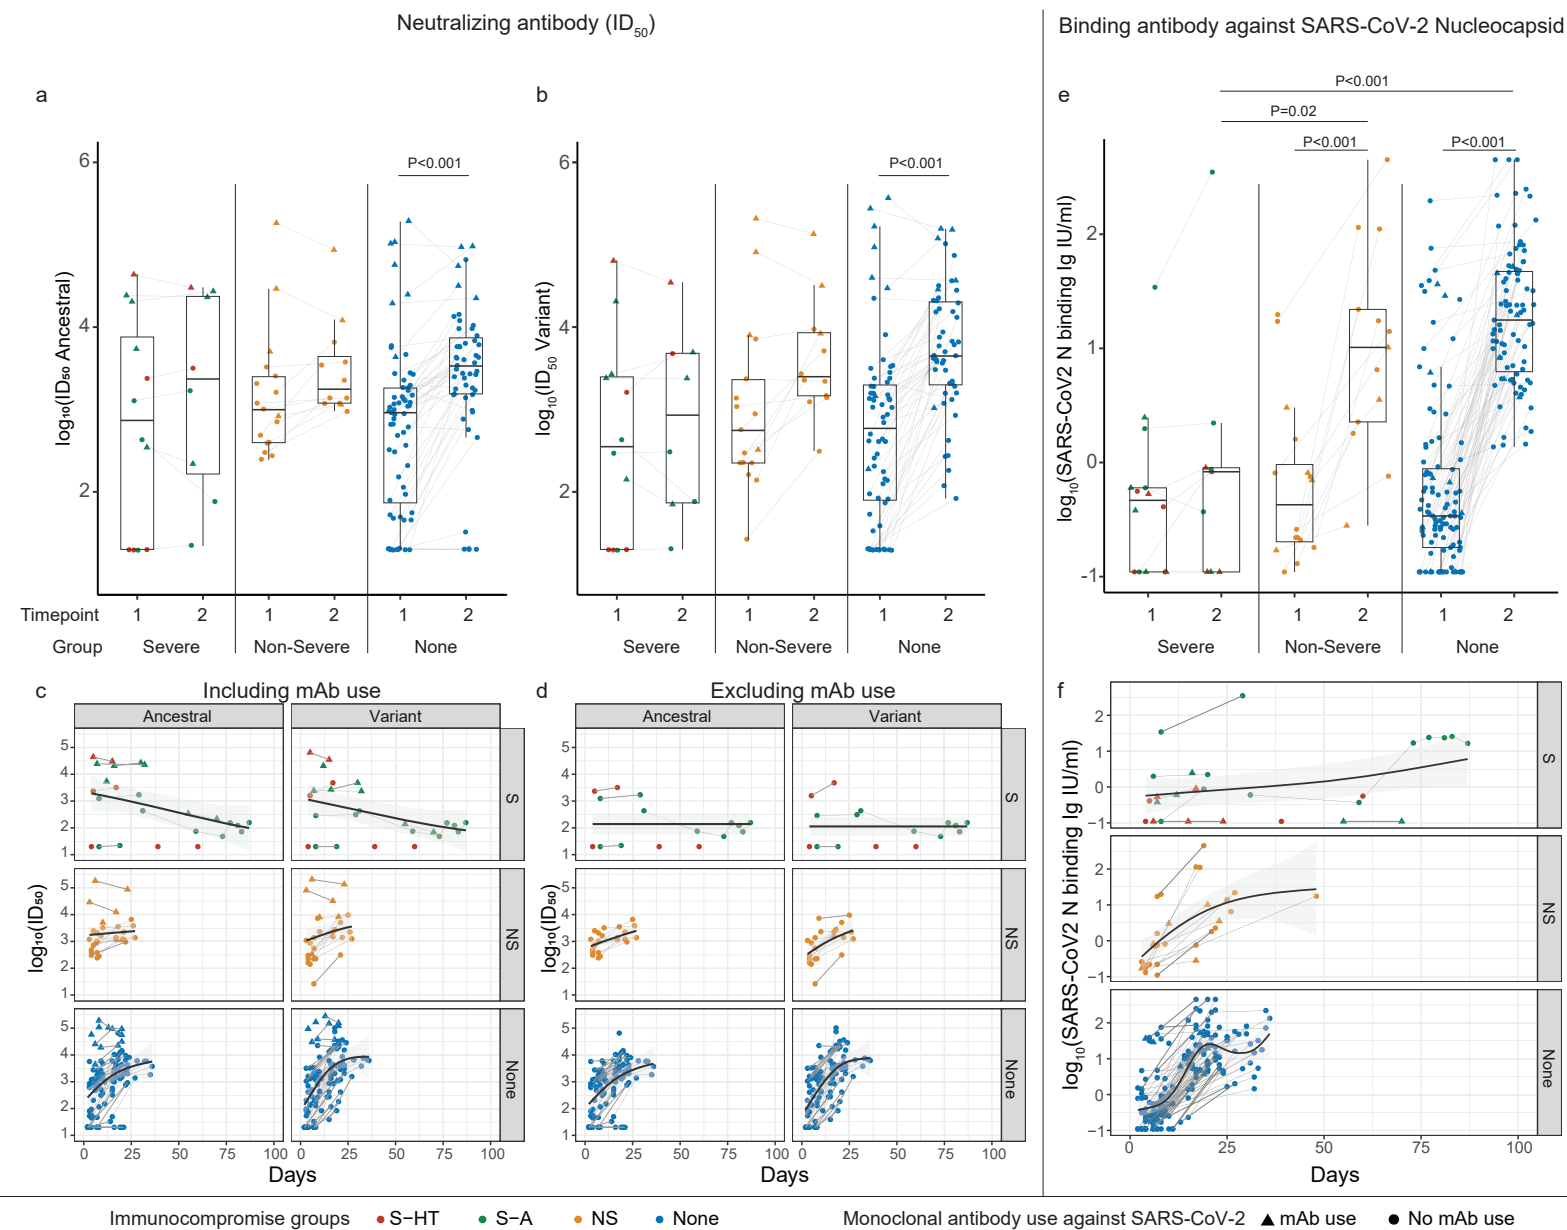

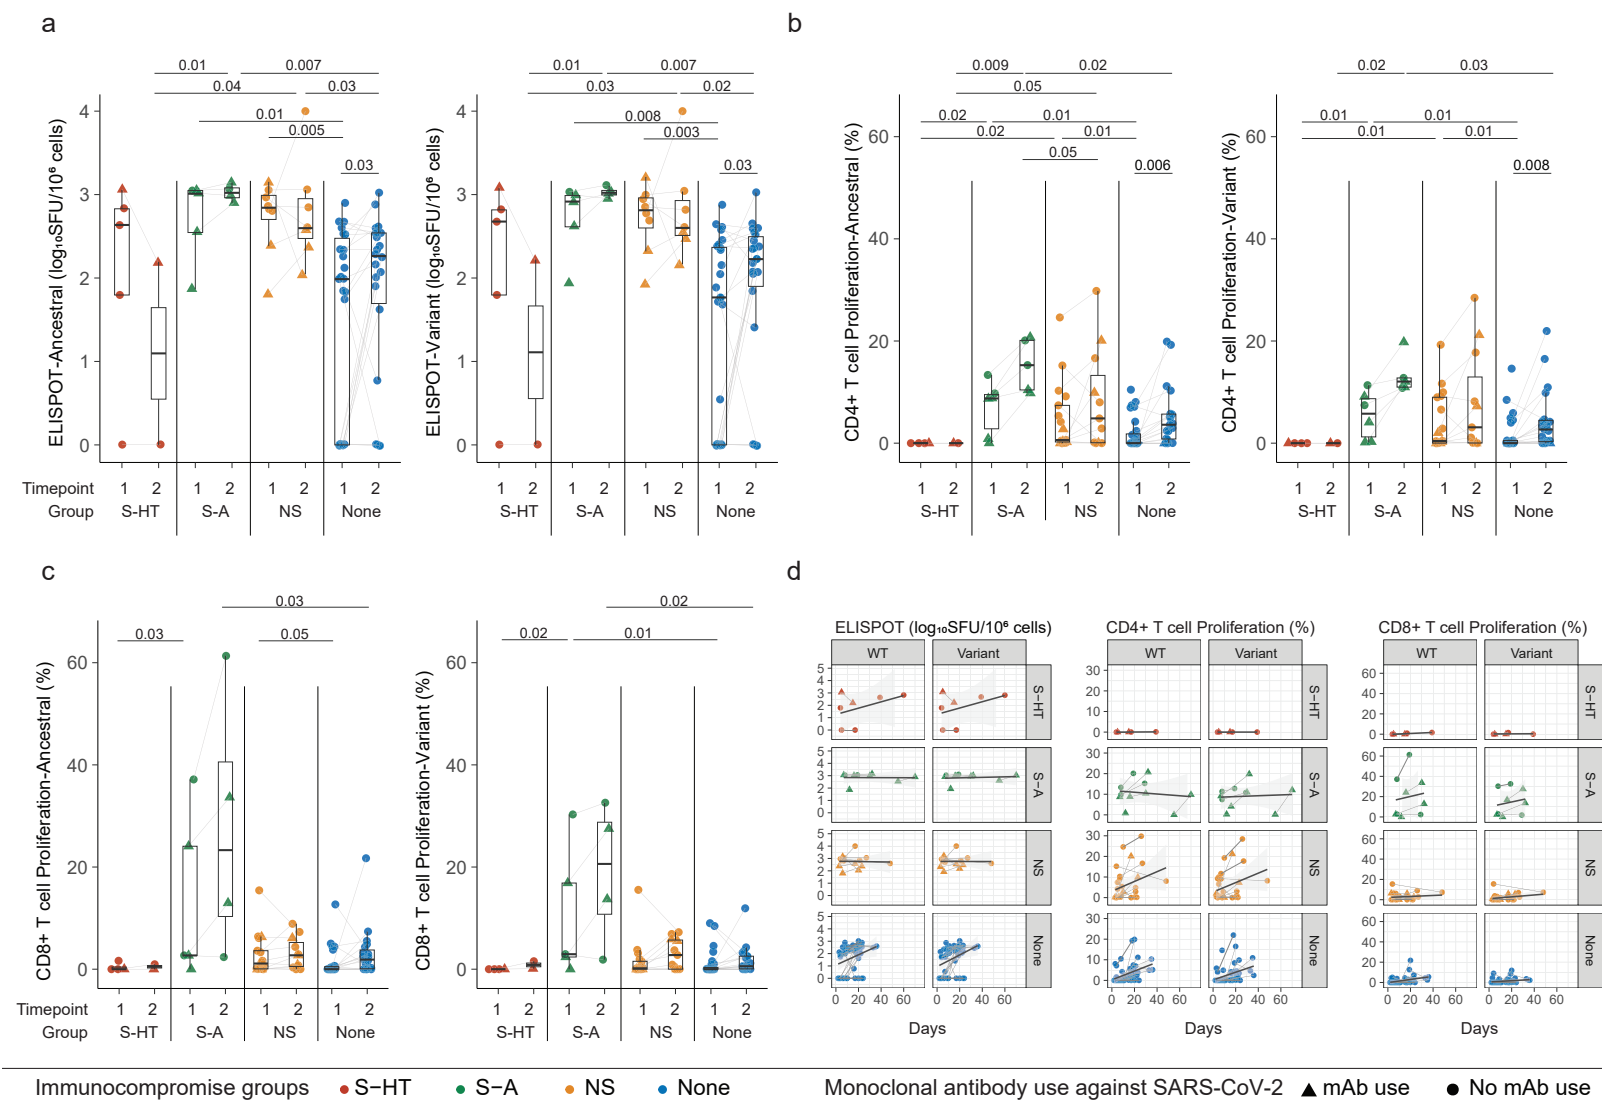

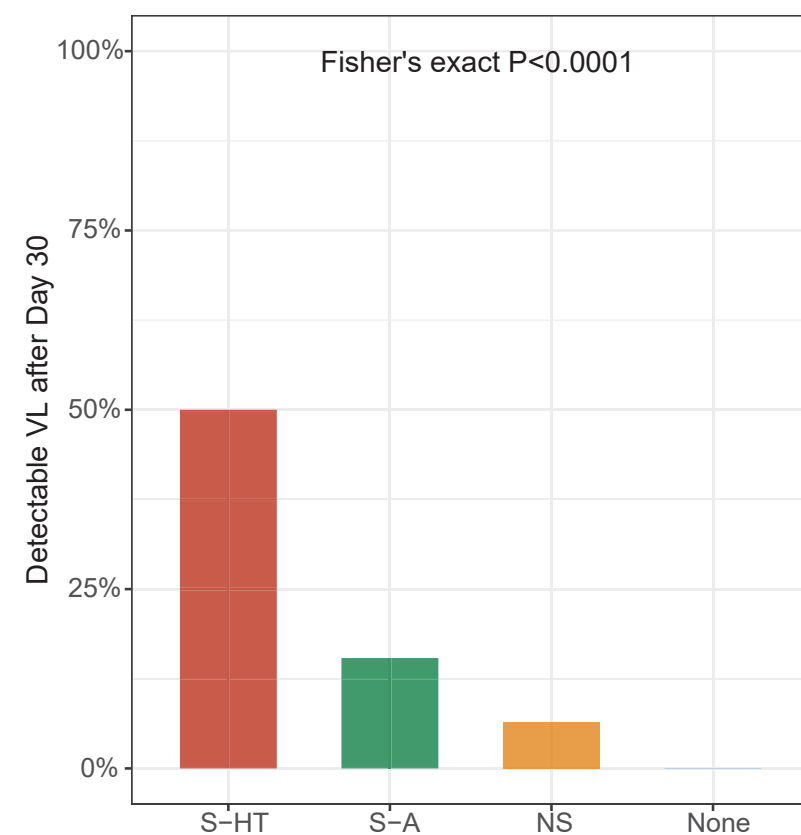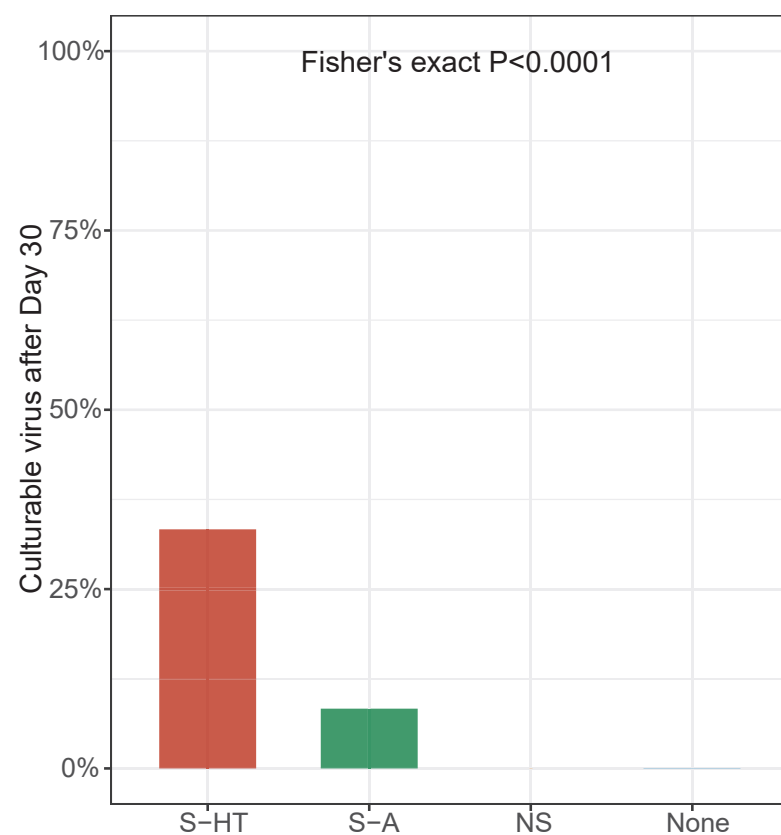

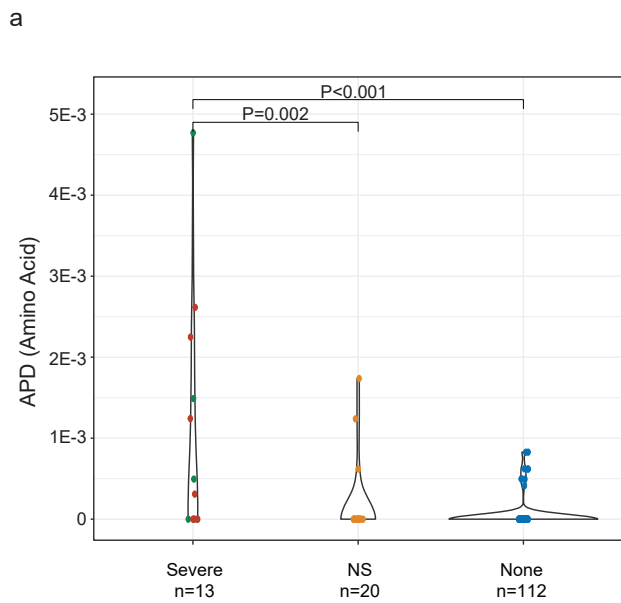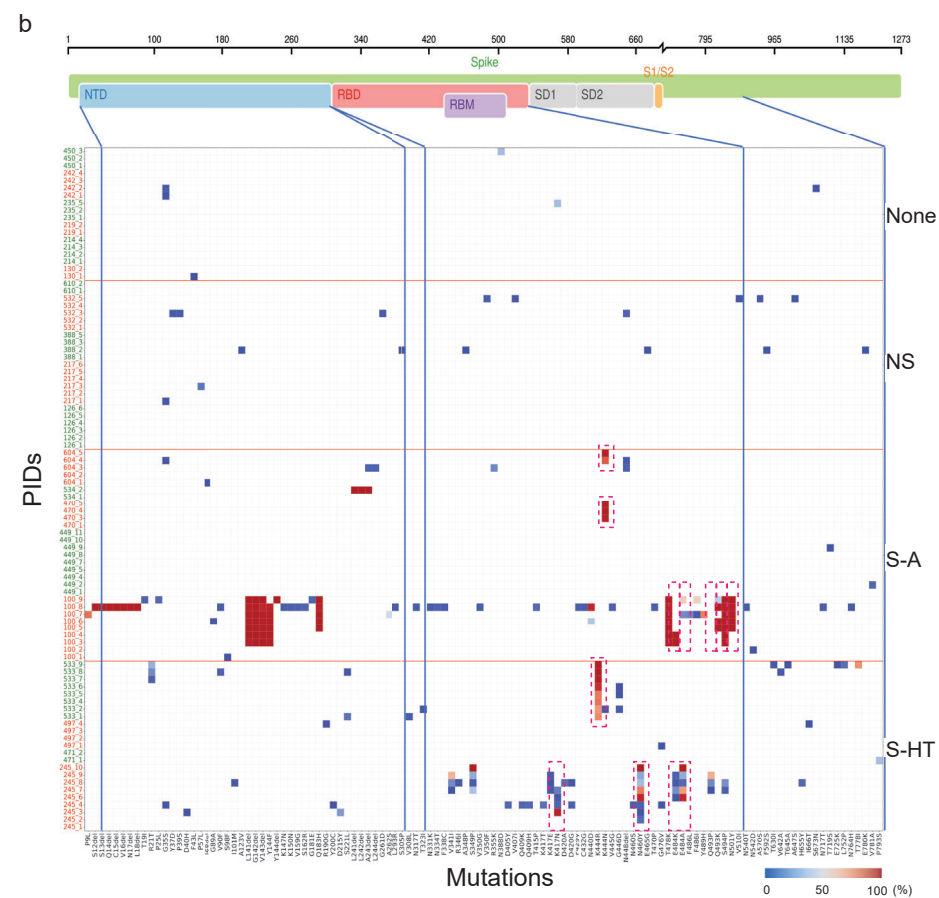

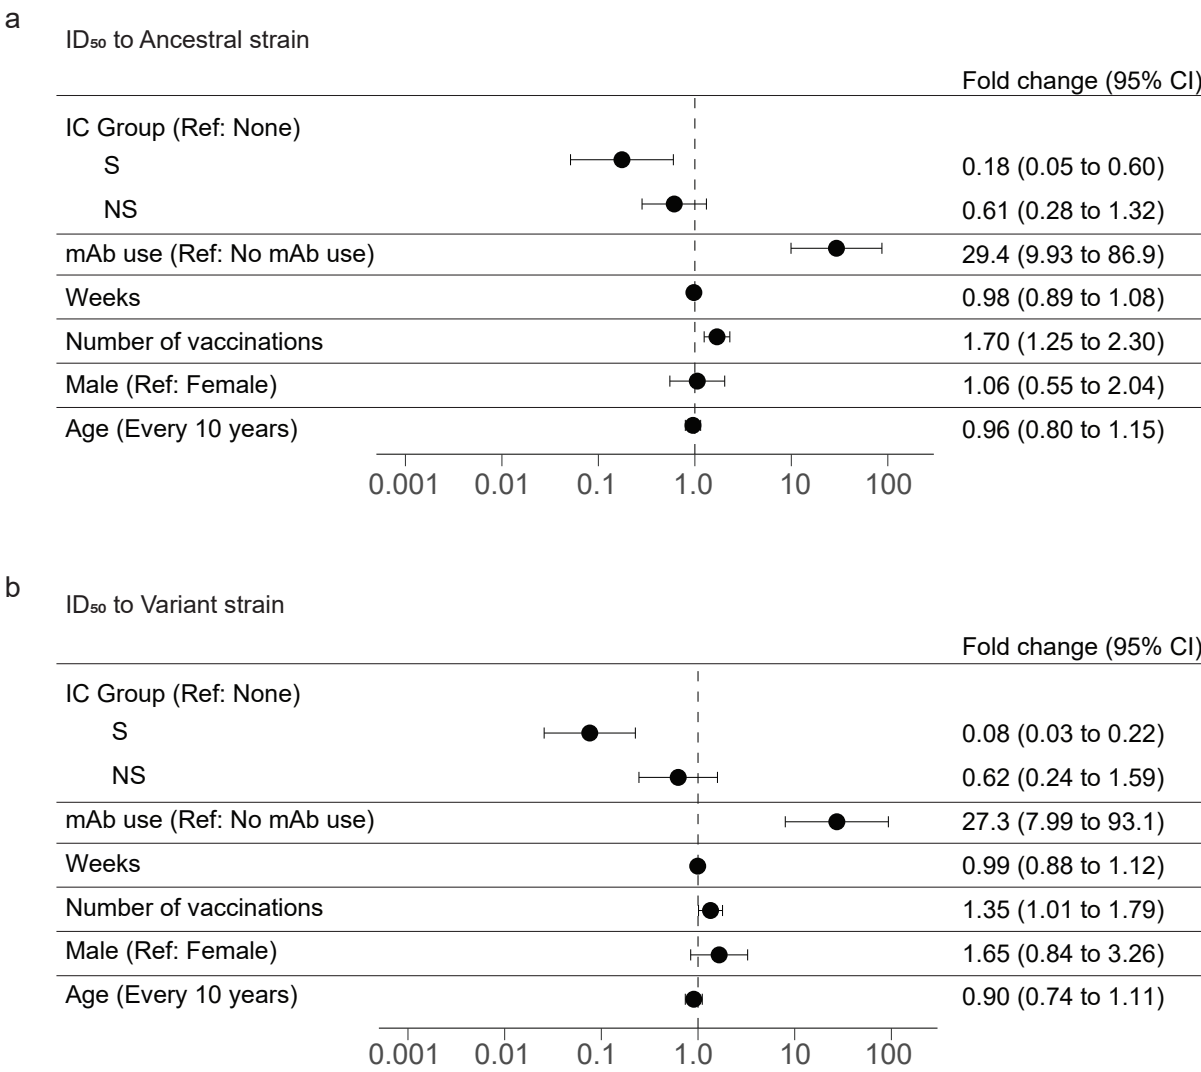

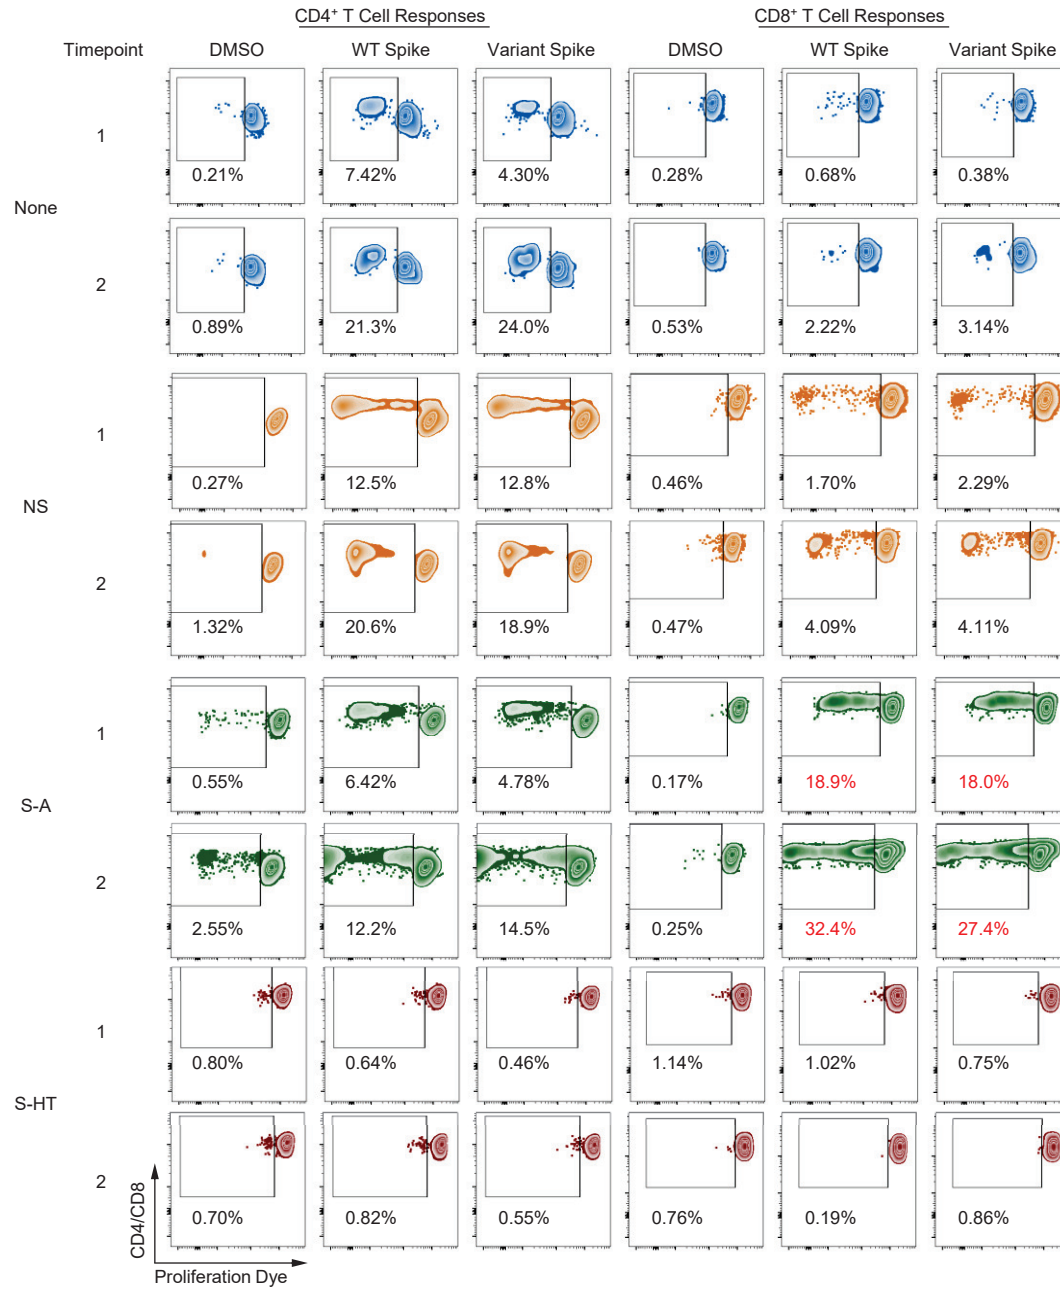

Source: https://medrxiv.org/content/10.1101/2023.07.31.23293441v1.full.pdf
